# Supplementary material
Source: HighWire-hosted journal article supplement (http://jpet.aspetjournals.org/highwire/filestream/135635/field_highwire_adjunct_files/0/JPET183772_fig_1.pdf)
Supplement: JPET183772_fig_1.pdf [file JPET183772_fig_1.pdf]

TAK-875, an Orally Available GPR40/FFA1 Agonist Enhances Glucose-Dependent Insulin Secretion and Improves Both Postprandial and Fasting Hyperglycemia in Type 2 Diabetic Rats

Yoshiyuki Tsujihata, Ryo Ito, Masami Suzuki, Ayako Harada, Nobuyuki Negoro, Tsuneo Yasuma, Yu Momose and Koji Takeuchi

Journal of Pharmacology and Experimental Therapeutics

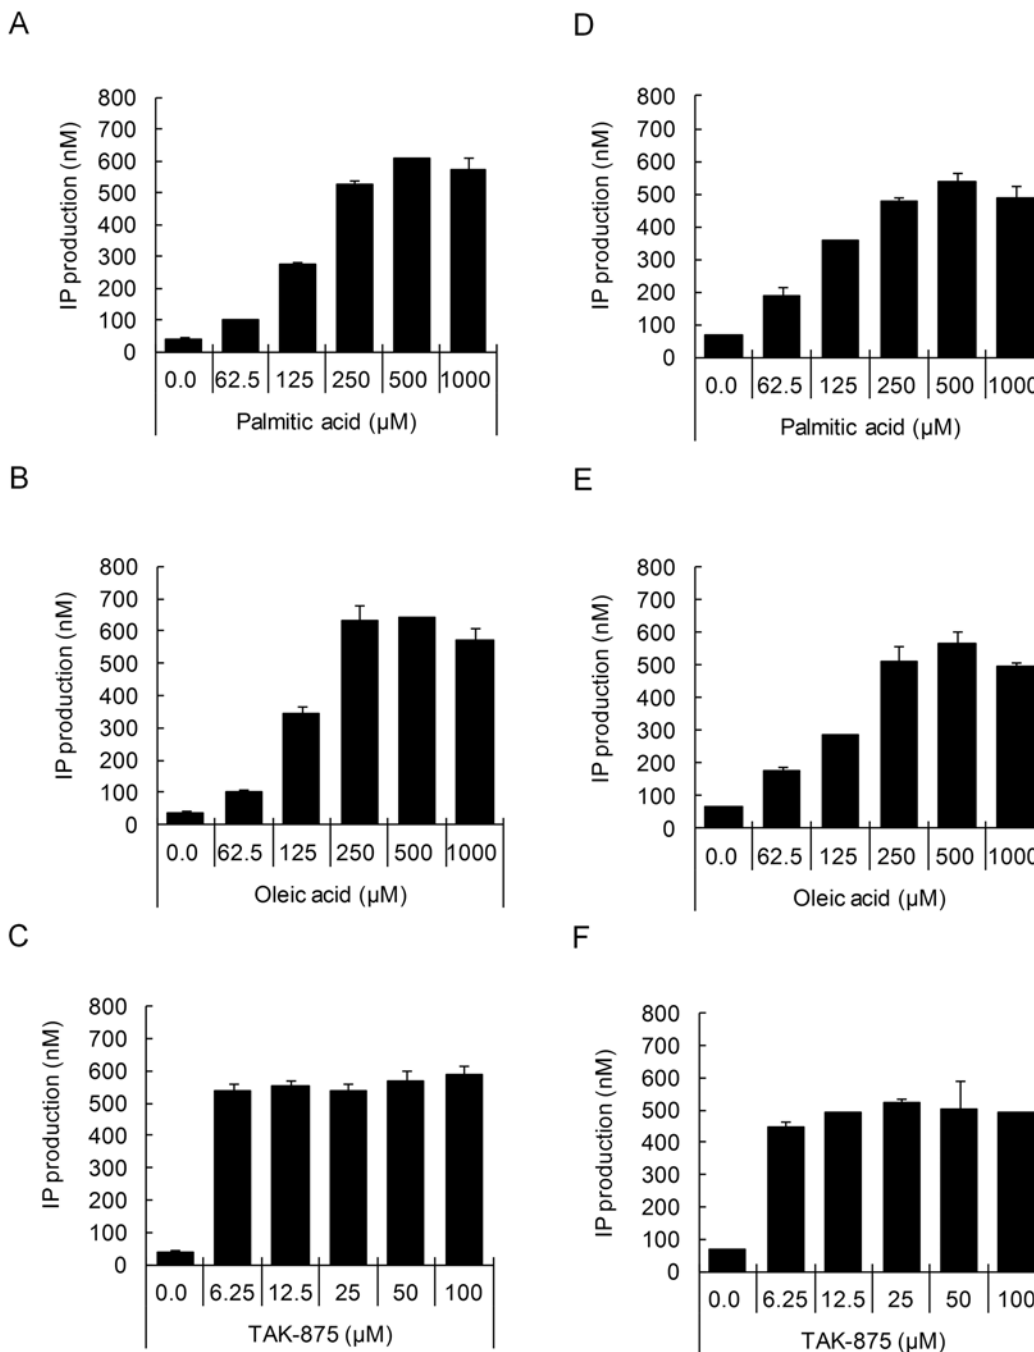

Supplemental Figure 1

Effects of palmitic acid, oleic acid and TAK-875 in the presence of 1% BSA on inositol monophosphate production in CHO cells expressing human or rat GPR40/FFA1. (A-C) IP production in CHO cells expressing human GPR40/FFA1. (D-F) IP production in CHO cells expressing rat GPR40/FFA1. CHO cells expressing human or rat GPR40/FFA1 were stimulated with palmitic acid (62.5 - 1000 μM) (A, D), oleic acid (62.5 - 1000 μM) (B, E) or TAK-875 (6.25 - 100 μM) (C, F) in the presence of 1% BSA, and intracellular inositol monophosphate (IP) levels were measured by ELISA. Data are mean + SD (n=2).
